# Supplementary material for: Bio-sourced phosphoprotein-based synthesis of silver-doped macroporous zinc phosphates and their antibacterial properties
Source: Royal Society of Chemistry journal article supplement (doi:10.1039/c8ra04438d), 2018-01-01
Supplement: c8ra04438d1.pdf [file c8ra04438d1.pdf]

### Supporting Information

**Table SI 1.** Bacterial proliferation calculated from bacteria's numbers measured on zinc phosphates obtained before thermal treatment at 2 h and 3 h of incubation, and Ag<sup>+</sup> and Zn<sup>2+</sup> ions contents in M63G medium after 3 h of exposition of solids to medium at 30 °C.

| Sample     | % bacterial proliferation (2 h to 3 h) | [Ag <sup>+</sup> ] M   | [Zn <sup>2+</sup> ] M       |
|------------|----------------------------------------|------------------------|-----------------------------|
| SW         | +87                                    | -                      | -                           |
| ZnPO/CN    | +57                                    | -                      | (11.9±0.1)×10 <sup>-5</sup> |
| ZnPO/CN/Ag | +22                                    | < 4.8×10 <sup>-6</sup> | (10.6±0.1)×10 <sup>-5</sup> |

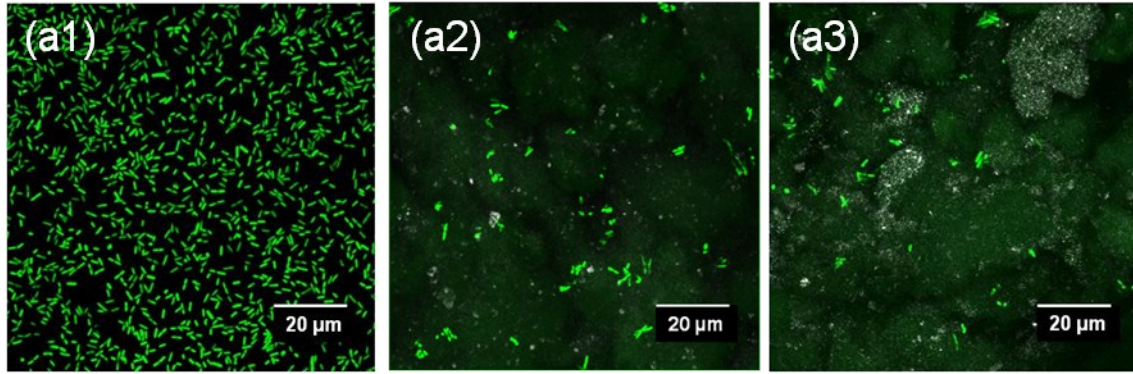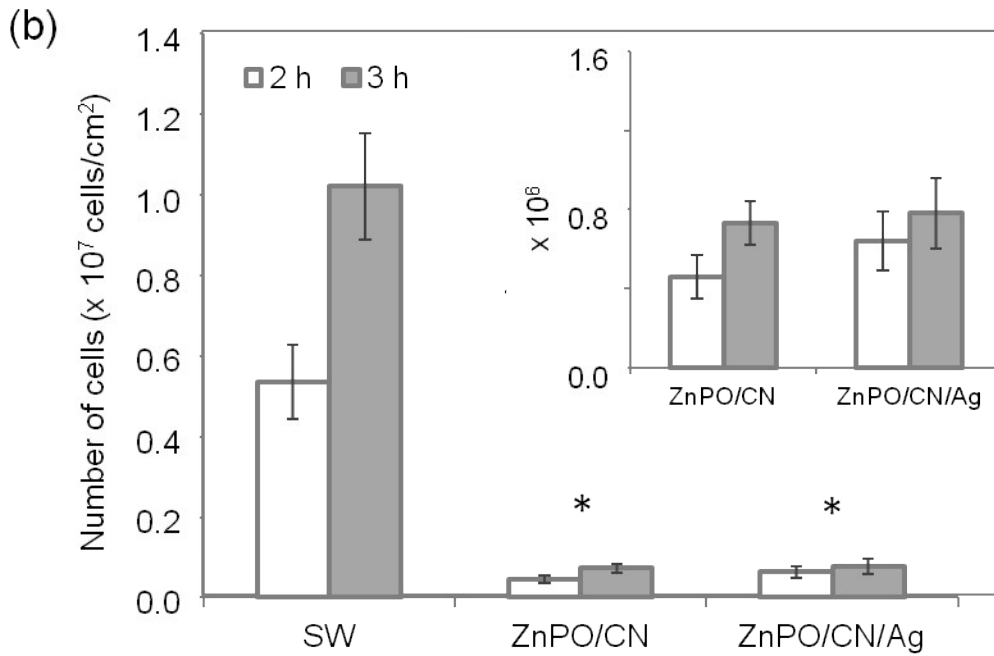

**Figure SI 1.** (a) 2D z-projection of confocal 3D images of *E.coli* K12 bacteria adherent on (a1) SW (a2) ZnPO/CN and (a3) ZnPO/CN/Ag materials after 3 h of incubation. (b) Number of bacteria on SW control, ZnPO/CN and ZnPO/CN/Ag materials after 2 h and 3 h of incubation (average of 6 experimental replicates). \* symbol indicates significant differences compared to SW (p-value < 0.05). Significant differences compared to ZnPO/CN have also been tested (p-value < 0.05). Inset is a zoom of histogram showing number of bacteria on ZnPO/CN and ZnPO/CN/Ag materials. Absence of any Ag-related bactericidal effect with ZnPO/CN/Ag material is attributed to both the low release and the low availability of Ag ions: (i) Ag ions released in bacterial culture medium from untreated material (ZnPO/CN/Ag) (undetectable i.e.,  $< 4.8 \times 10^{-6} \text{M}$ ) are less or just reaching the minimal concentration for biocidal activity on *E. coli* ( $10^{-6} \text{M}$ ); (ii) Interactions between released Ag ions and culture medium are known to reduce availability of Ag ions for antibacterial activity.
